just-in-time engagement. In this approach, patients were identified and matched with researchers with shared research interests without preemptive patient and stakeholder education and training. Ten research teams initiated engaged research design between August and October of 2019. In this presentation, we will share process and outcomes measures of the just-in-time approach: measures of ongoing engagement at 6 and 9 months; evidence of research productivity, and patient and stakeholder satisfaction with their research involvement. We will also address ethical challenges, including challenges to engaging a diverse population. Part of a symposium sponsored by the Patient/Person Engagement in Research Interest Group.

#### DEFINING THE PARTICIPATORY ASPECT IN HEALTH AND DEMENTIA CARE RESEARCH

Martina Roes, *German Center for Neurodegenerative Diseases (DZNE), Witten, Germany*

In the last decade, the terms 'engagement', 'involvement', 'patient-public involvement (PPI)' and/or 'participatory research' have been increasingly used in literature. However, it seems that each author has their own definition of the terms and there is not consensus on what constitutes engagement, involvement or participation in health care research. In a broad sense, it seems that PPI can be understood as a co-design strategy, but the terms are not used consistently. Definitions of participation in research tend toward describing the methodological aspect of research rather than mapping appropriate use of methods. Representation of the diversity of society is also challenging and involvement of people with dementia is often neglected. To improve participatory research and outcomes, it is valuable to understand applied methods. Therefore, we conducted a meta-analysis of literature reviews that analyzed methodological concepts and application of these participatory concepts. This presentation will provide key results of this review. Part of a symposium sponsored by the Patient/Person Engagement in Research Interest Group.

#### APPLYING ENGAGEMENT FRAMEWORKS TO CASE SCENARIOS: A RETROSPECTIVE ANALYSIS

Erin McGaffigan, *Gerontology Institute, North Reading, United States*

The LeadingAge LTSS Center @UMass Boston has worked with the Patient-Centered Outcomes Research Institute (PCORI), service recipients, researchers, and providers since 2017 to understand the obstacles and creative solutions for meaningful and effective engagement in research. The LTSS Center's work has been informed by multiple engagement frameworks, including Dr. McGaffigan's 2011 PAE Attention Framework, the result of a multi-state, multi-site research study examining the factors to user engagement in Cash & Counseling programs. In this presentation, we will apply the PAE Attention Framework (2011), the PCORI Engagement

Rubric (2014), and the NHS INVOLVE Framework (2015) to three research study case scenarios to understand the strategies used, outcomes realized, and factors influencing engagement success. Lessons learned from each and their application to future research will be discussed, including ethical considerations. Part of a symposium sponsored by the Patient/Person Engagement in Research Interest Group.

#### PRACTICAL, METHODOLOGICAL, AND ETHICAL CONSIDERATIONS OF USER INVOLVEMENT

Roger O'Sullivan, *Institute of Public Health in Ireland, Belfast & Dublin, Northern Ireland, Ireland*

Traditionally, older people were seen simply as 'subjects' of research but increasingly the case for utilizing the knowledge and insights of older people in planning research, policy, and services is gaining momentum. This presentation explores the nature of user involvement, focusing not just on the practical and methodological considerations, but the ethical aspects, which are often under-discussed. Prof O'Sullivan argues that the increasing focus on user involvement is welcomed but we need to understand and debate how it can be appropriate, meaningful, and beneficial for all involved. Using desk research as well as the results of a web-based survey and semi-structured interviews with researchers, government, and NGO representatives, Prof O'Sullivan will set out the practical as well as the ethical aspects of user involvement. He will recommend how researchers, funders, professional bodies and older people's organizations and older people themselves can best advance the user involvement agenda. Part of a symposium sponsored by the Patient/Person Engagement in Research Interest Group.

#### DEVELOPMENTAL EVALUATION OF AN ESTABLISHED ADVISORY BOARD

Rachel Lessem, *CJE SeniorLife, Chicago, Illinois, United States*

CJE SeniorLife developed the PCORI-funded Bureau of Sages, a research advisory board of nursing home community members and older adults, who live at home and receive long term services and supports (LTSS). Bureau members share experiences, build knowledge, and develop skills for working together to provide voice to the direction, design, and implementation of aging research. The PCORI-funded Sages in Every Setting project developed four additional bureaus, expanding and diversifying a pool of researchers, providers, and older adults living with LTSS who have the knowledge, skills, and opportunity to collaborate in research. Evaluation results reveal that the Sage Model is translatable into new settings; partners were able to adapt the provided resources; researchers receive useful input from bureaus to improve their work; and, participation in a research advisory board is a benefit to its members. In addition, we will share challenges to establishing and expanding the Sage Model. Part of a symposium sponsored by the Patient/Person Engagement in Research Interest Group.
